# Supplementary material for: Provider-patient communication about Zika during prenatal visits
Source: PubMed Central journal article supplement (PMC5447381; doi:10.1016/j.pmedr.2017.05.003), 2017-05-18
Supplement: mmc1.pdf [file mmc1.pdf]

**Supplemental Figure 1.** Numbers of participants from each State in the US (N=492).

Southern states are in **yellow color**, Northeastern states in **green color**, Midwestern states in **blue color**, and Western states in **red color**.

**Supplemental Figure 2.** Level of concern about Zika affecting their own health or their babies' health among pregnant women (n=469).

Supplemental Figure 1

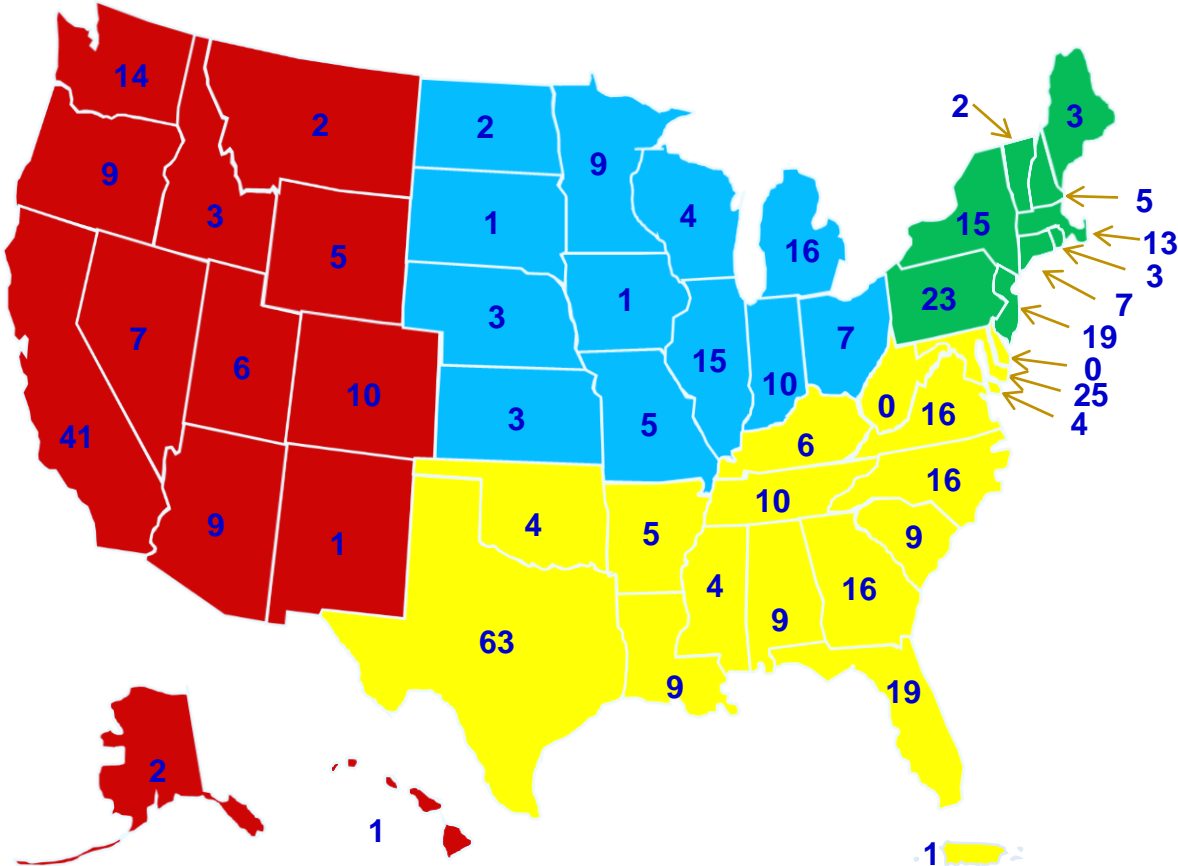

**Supplemental Figure 2**

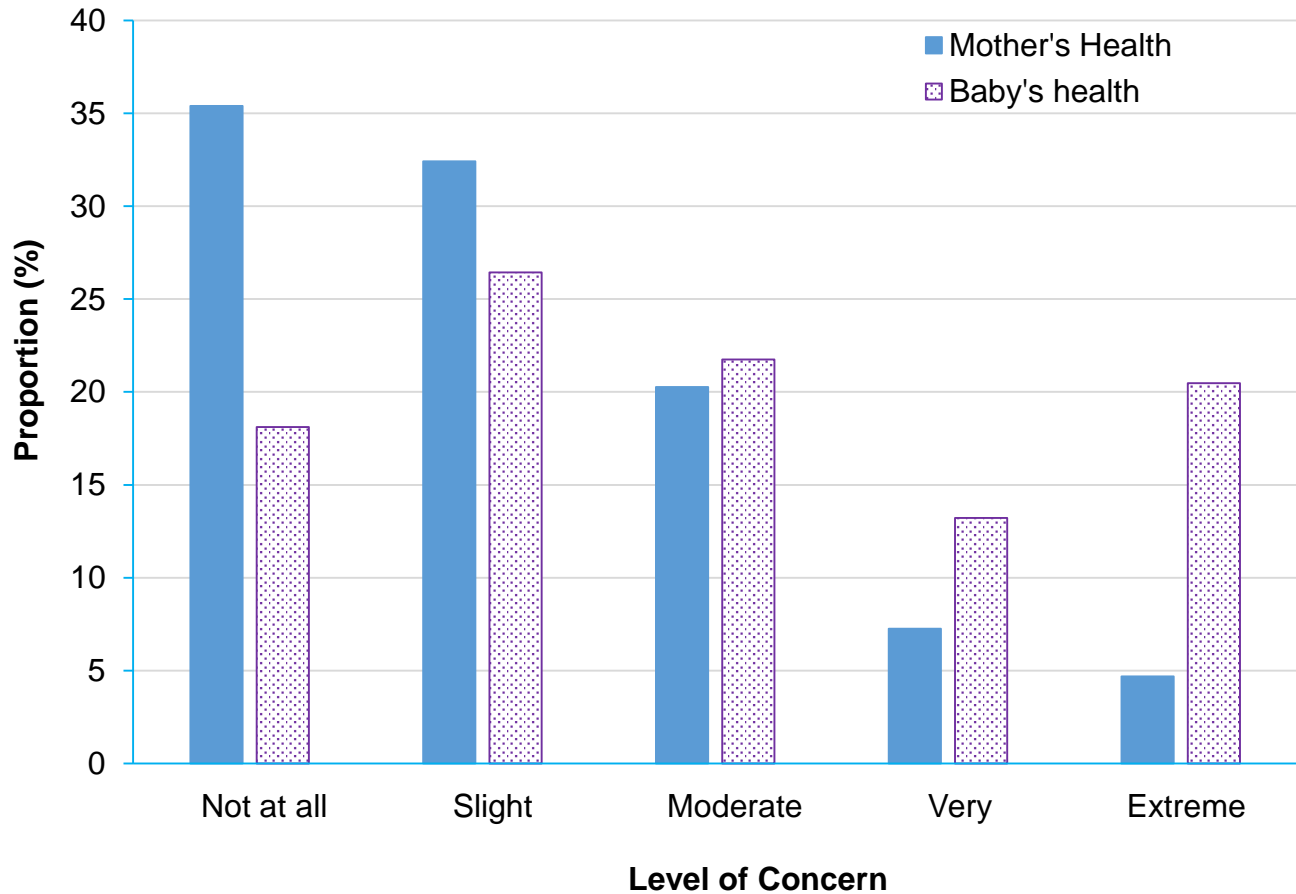

Supplemental Table 1. Sociodemographic characteristics among participants from Reddit and participants from other websites.

|                             | n (%)      |              |               |
|-----------------------------|------------|--------------|---------------|
|                             | All        | Reddit       | Other Sources |
| <b>All</b>                  | 492 (100)  | 418 ( 85.0 ) | 74 ( 15.0 )   |
| <b>Age</b>                  |            |              |               |
| ≤30 years                   | 261 (53.1) | 224 ( 45.5 ) | 37 ( 7.5 )    |
| >30 years                   | 231 (47)   | 194 ( 39.4 ) | 37 ( 7.5 )    |
| <b>Region of residence</b>  |            |              |               |
| South                       | 216 (43.9) | 178 ( 36.2 ) | 38 ( 7.7 )    |
| Northeast                   | 90 (18.3)  | 80 ( 16.3 )  | 10 ( 2.0 )    |
| Midwest                     | 76 (15.5)  | 62 ( 12.6 )  | 14 ( 2.8 )    |
| West                        | 110 (22.4) | 98 ( 19.9 )  | 12 ( 2.4 )    |
| <b>Country of birth</b>     |            |              |               |
| US                          | 458 (93.1) | 388 ( 78.9 ) | 70 ( 14.2 )   |
| Other                       | 34 (6.9)   | 30 ( 6.1 )   | 4 ( 0.8 )     |
| <b>Race/ethnicity</b>       |            |              |               |
| Non-Hispanic White          | 421 (85.6) | 365 ( 74.2 ) | 56 ( 11.4 )   |
| Other                       | 71 (14.4)  | 53 ( 10.8 )  | 18 ( 3.7 )    |
| <b>Education level</b>      |            |              |               |
| Master's or doctoral degree | 190 (38.6) | 166 ( 33.7 ) | 24 ( 4.9 )    |
| 4-year college degree       | 189 (38.4) | 163 ( 33.1 ) | 26 ( 5.3 )    |
| No college degree           | 113 (23)   | 89 ( 18.1 )  | 24 ( 4.9 )    |
| <b>Relationship status</b>  |            |              |               |
| Married                     | 426 (86.6) | 369 ( 75.0 ) | 57 ( 11.6 )   |
| Other                       | 66 (13.4)  | 49 ( 10.0 )  | 17 ( 3.5 )    |

Chi-squared and Fisher's exact tests were used to compare the differences in sociodemographic characteristics between participants from Reddit and participants from other websites. There were no differences in sociodemographic characteristics between participants from Reddit and participants from other sources, except that participants from Reddit had slightly higher proportion of non-Hispanic Whites (87.3% vs. 75.7%,  $p=0.009$ ) and married women (88.3% vs. 77%,  $p=0.009$ ) than participants from other sources.

Supplemental Table 2. Health care providers' recommendations regarding travel to areas with Zika outbreaks (n=138).

|                                           | Percentage %<br>(95% Confidence Interval) |
|-------------------------------------------|-------------------------------------------|
| Avoid travel to areas with Zika outbreaks | 94.9 (91.2-98.6)                          |
| Use mosquito spray                        | 51.4 (43-59.9)                            |
| Wear long-sleeved shirts or long pants    | 41.3 (33-49.6)                            |
| Treat clothing and gear with permethrin   | 11.6 (6.2-17)                             |
| Stay in rooms with air conditioning       | 32.6 (24.7-40.5)                          |
| Sleep under a mosquito bed net            | 10.1 (5-15.2)                             |

Among pregnant women who reported that their providers discussed risks related to travel to areas with current Zika outbreaks.

Supplemental Table 3. Knowledge about Zika, provider-patient communication about Zika about Zika, and level of concern about Zika affecting their own health or their babies' health among pregnant women from Reddit and other websites.

|                                                               | Prevalence % (95% CI) |                         |
|---------------------------------------------------------------|-----------------------|-------------------------|
|                                                               | Reddit<br>(n=418)     | Other Sources<br>(n=74) |
| <b>Heard of Zika</b>                                          | 98.8 (97.8-99.8)      | 91.9 (85.7-98.1)        |
| Heard of Zika from the Internet                               | 74.6 (70.4-78.8)      | 50.0 (38.1-61.9)        |
| Heard of Zika from TV news                                    | 16.0 (12.4-19.5)      | 39.7 (28.0-51.4)        |
| Aware of CDC travel alerts                                    | 90.6 (87.7-93.4)      | 89.7 (82.5-97.0)        |
| <b>Provider-patient communication about Zika</b>              | 33.3 (28.8-37.9)      | 33.8 (22.5-45.1)        |
| <b>Very or extremely concerned about Zika</b>                 |                       |                         |
| Affecting their own health                                    | 11.9 (8.7-15.1)       | 12.1 (4.2-20.0)         |
| Affecting their babies' health                                | 33.0 (28.4-37.6)      | 37.9 (26.1-49.6)        |
| <b>Knowledge about Zika</b>                                   |                       |                         |
| Route of transmission identified incorrectly                  | 4.7 (2.6-6.7)         | 9.1 (2.1-16.1)          |
| Symptoms identified incorrectly                               | 11.1 (8.0-14.2)       | 12.1 (4.2-20.0)         |
| Assume cure for Zika infection                                | 1.0 (0.0-2.0)         | 1.5 (0.0-4.5)           |
| Not know birth defect associated with Zika infection          | 0.7 (0.0-1.6)         | 1.5 (0.0-4.5)           |
| Not Microcephaly as the most commonly associated birth defect | 0.5 (0.0-1.2)         | 3.2 (0.0-7.6)           |
